# Supplementary material
Source: PubMed Central journal article supplement (PMC3943488)
Supplement: NIHMS528148-supplement-10439_2013_915_MOESM1_ESM.pdf [file NIHMS528148-supplement-10439_2013_915_MOESM1_ESM.pdf]

## Supplementary Table 1

## Mean Ct Numbers and Mean Plate Efficiencies, Raw Data

Information on following page.

| Sample ID | info | Actb   |            | Bgn           |                   | Dcn           |                   | Actb   |            | Fmod          |                   | Lum           |                   |
|-----------|------|--------|------------|---------------|-------------------|---------------|-------------------|--------|------------|---------------|-------------------|---------------|-------------------|
|           |      | Ct     | Eff        | Ct            | Eff               | Ct            | Eff               | Ct     | Eff        | Ct            | Eff               | Ct            | Eff               |
| 017L      | c-un | 25.137 | 1.924 (1)  | 23.384        | 1.827(1)          | <b>17.485</b> | <b>1.933 (1)</b>  | 24.404 | 1.909 (18) | 20.521        | 2.027 (1)         | 24.074        | 1.849 (18)        |
| 018R      | c-un | 27.054 | 1.924 (1)  | 24.568        | 1.827(1)          | 20.456        | 1.933 (1)         | 26.323 | 1.909 (18) | 21.935        | 2.027 (1)         | 25.205        | 1.849 (18)        |
| 020L      | c-un | 23.376 | 1.924 (1)  | 22.706        | 1.827(1)          | 19.119        | 1.933 (1)         | 22.750 | 1.909 (18) | 20.895        | 2.027 (1)         | 24.193        | 1.849 (18)        |
| 024R      | c-un | 26.831 | 1.924 (1)  | 26.090        | 1.827(1)          | 20.366        | 1.933 (1)         | 26.209 | 1.909 (18) | 24.259        | 2.027 (1)         | 24.540        | 1.849 (18)        |
| 021L      | c-un | 38.379 | 2.046 (2)  | 37.156        | 1.978 (2)         | 36.935        | 2.052 (2)         | 39.216 | 2.014 (19) | <b>34.826</b> | <b>2.004 (19)</b> | 41.665        | 2.016 (19)        |
| 037R      | c-un | 31.730 | 1.859 (3)  | 38.692        | 1.678 (3)         | 31.997        | 1.625 (3)         | 31.648 | 1.847 (20) | 27.321        | 1.993 (20)        | 31.563        | 1.823 (20)        |
| 038L      | c-un | 25.994 | 1.859 (3)  | 28.180        | 1.678 (3)         | 26.854        | 1.625 (3)         | 26.013 | 1.847 (20) | 22.801        | 1.993 (20)        | 30.498        | 1.823 (20)        |
| 006L      | c-3  | 18.572 | 2.046 (2)  | 17.445        | 1.978 (2)         | 15.844        | 2.052 (2)         | 20.063 | 2.014 (19) | 17.388        | 2.004 (19)        | 18.905        | 2.016 (19)        |
| 008R      | c-3  | 17.920 | 2.046 (2)  | 17.758        | 1.978 (2)         | 14.675        | 2.052 (2)         | 19.919 | 2.014 (19) | <b>16.269</b> | <b>2.004 (19)</b> | <b>17.173</b> | <b>2.016 (19)</b> |
| 009L      | c-3  | 19.744 | 1.866 (4)  | 16.835        | 1.923 (4)         | 14.358        | 1.790 (4)         | 18.111 | 1.974 (20) | 16.442        | 1.905 (20)        | 17.708        | 2.043 (20)        |
| 028L      | c-3  | 17.549 | 1.866 (4)  | 16.676        | 1.923 (4)         | 15.288        | 1.790 (4)         | 17.196 | 1.974 (20) | 17.136        | 1.905 (20)        | 17.773        | 2.043 (20)        |
| 030L      | c-3  | 17.777 | 1.866 (4)  | 17.175        | 1.923 (4)         | 14.882        | 1.790 (4)         | 17.555 | 1.974 (20) | 15.656        | 1.905 (20)        | 17.002        | 2.043 (20)        |
| 031R      | c-3  | 17.268 | 1.866 (4)  | 17.580        | 1.923 (4)         | 15.096        | 1.790 (4)         | 17.540 | 1.974 (20) | 16.784        | 1.905 (20)        | 17.057        | 2.043 (20)        |
| 033R      | c-3  | 19.761 | 1.866 (4)  | 18.198        | 1.923 (4)         | 15.063        | 1.790 (4)         | 18.026 | 1.974 (20) | 16.627        | 1.905 (20)        | 17.486        | 2.043 (20)        |
| 013R      | c-6  | 25.713 | 1.897 (5)  | 24.791        | 1.829 (5)         | 19.804        | 1.971 (5)         | 25.868 | 1.903 (21) | 22.925        | 1.983 (21)        | 24.779        | 1.842 (21)        |
| 016L      | c-6  | 26.613 | 1.897 (5)  | 25.203        | 1.829 (5)         | 20.265        | 1.971 (5)         | 26.603 | 1.903 (21) | 23.652        | 1.983 (21)        | 26.419        | 1.842 (21)        |
| 015R      | c-6  | 24.817 | 1.897 (5)  | <b>22.040</b> | <b>1.829 (5)</b>  | 17.367        | 1.971 (5)         | 23.994 | 1.903 (21) | 21.113        | 1.983 (21)        | 22.620        | 1.842 (21)        |
| 003R      | c-6  | 25.693 | 1.897 (5)  | 25.126        | 1.829 (5)         | 18.436        | 1.971 (5)         | 24.428 | 1.903 (21) | 21.329        | 1.983 (21)        | 25.998        | 1.842 (21)        |
| 001L      | c-6  | 18.409 | 2.046 (2)  | 19.633        | 1.978 (2)         | 15.217        | 2.052 (2)         | 20.374 | 2.014 (19) | 17.978        | 2.004 (19)        | 20.305        | 2.016 (19)        |
| 004L      | c-6  | 17.424 | 2.046 (2)  | 19.085        | 1.978 (2)         | 14.275        | 2.052 (2)         | 19.837 | 2.014 (19) | 16.827        | 2.004 (19)        | 19.299        | 2.016 (19)        |
| 010R      | c-6  | 19.230 | 2.046 (2)  | 21.188        | 1.978 (2)         | 16.049        | 2.052 (2)         | 21.301 | 2.014 (19) | 18.327        | 2.004 (19)        | 20.135        | 2.016 (19)        |
| 034R      | c-6  | 18.950 | 2.046 (2)  | 18.497        | 1.978 (2)         | 16.155        | 2.052 (2)         | 19.431 | 2.014 (19) | 20.945        | 2.004 (19)        | 20.541        | 2.016 (19)        |
| 036R      | c-6  | 18.352 | 2.046 (2)  | 20.586        | 1.978 (2)         | 14.734        | 2.052 (2)         | 19.505 | 2.014 (19) | 17.657        | 2.004 (19)        | 20.663        | 2.016 (19)        |
| 603L      | c-6  | 24.413 | 1.846 (6)  | 26.696        | 1.761 (6)         | <b>16.571</b> | <b>1.807 (6)</b>  | 25.833 | 1.759 (22) | <b>18.044</b> | <b>1.806 (22)</b> | 21.996        | 1.830 (22)        |
| 604L      | c-6  | 23.088 | 1.846 (6)  | 23.765        | 1.761 (6)         | 21.422        | 1.807 (6)         | 23.043 | 1.759 (22) | 21.946        | 1.806 (22)        | 25.705        | 1.830 (22)        |
| 007R      | b-un | 25.663 | 1.946 (7)  | 32.022        | 1.918 (7)         | <b>16.839</b> | <b>2.032 (7)</b>  | 23.636 | 1.940 (23) | 19.844        | 1.993 (7)         | <b>24.299</b> | <b>1.943 (23)</b> |
| 010L      | b-un | 22.823 | 1.946 (7)  | 28.548        | 1.918 (7)         | 16.005        | 2.032 (7)         | 22.423 | 1.940 (23) | 18.300        | 1.993 (7)         | 21.930        | 1.943 (23)        |
| 006R      | b-un | 18.322 | 1.909 (8)  | 29.239        | 1.838 (8)         | 16.140        | 1.836 (8)         | 18.346 | 2.027 (24) | 16.136        | 2.060 (24)        | 15.645        | 2.049 (24)        |
| 012L      | b-un | 22.166 | 1.909 (8)  | undetermined  | 1.838 (8)         | 19.062        | 1.836 (8)         | 22.438 | 2.027 (24) | 20.255        | 2.060 (24)        | 19.613        | 2.049 (24)        |
| 027R      | b-un | 22.470 | 1.909 (8)  | 39.956        | 1.838 (8)         | 20.210        | 1.836 (8)         | 22.517 | 2.027 (24) | 19.102        | 2.060 (24)        | 18.633        | 2.049 (24)        |
| 013R      | b-un | 18.499 | 1.982 (9)  | 28.091        | 1.791 (9)         | 15.567        | 2.077 (9)         | 19.268 | 1.902 (25) | 17.954        | 1.972 (25)        | 19.011        | 1.903 (25)        |
| 028R      | b-un | 19.730 | 1.982 (9)  | 30.549        | 1.791 (9)         | 15.505        | 2.077 (9)         | 21.711 | 1.902 (25) | 19.281        | 1.972 (25)        | 17.609        | 1.903 (25)        |
| 030L      | b-un | 23.022 | 1.982 (9)  | 38.122        | 1.791 (9)         | 18.410        | 2.077 (9)         | 24.800 | 1.902 (25) | 21.351        | 1.972 (25)        | 23.467        | 1.903 (25)        |
| 031L      | b-un | 24.411 | 1.982 (9)  | 39.148        | 1.791 (9)         | 19.668        | 2.077 (9)         | 25.629 | 1.902 (25) | 24.090        | 1.972 (25)        | 32.356        | 1.903 (25)        |
| 033R      | b-un | 26.578 | 1.982 (9)  | 37.299        | 1.791 (9)         | 20.183        | 2.077 (9)         | 27.632 | 1.902 (25) | 22.315        | 1.972 (25)        | 29.577        | 1.903 (25)        |
| 037L      | b-un | 17.543 | 1.982 (9)  | 33.706        | 1.791 (9)         | 14.088        | 2.077 (9)         | 19.131 | 1.902 (25) | 15.572        | 1.972 (25)        | 18.725        | 1.903 (25)        |
| 034L      | b-un | 23.014 | 1.982 (9)  | 40.992        | 1.791 (9)         | 17.874        | 2.077 (9)         | 24.270 | 1.902 (25) | 22.807        | 1.972 (25)        | 22.360        | 1.903 (25)        |
| 036L      | b-un | 20.683 | 1.982 (9)  | 40.041        | 1.791 (9)         | 15.254        | 2.077 (9)         | 21.906 | 1.902 (25) | 18.069        | 1.972 (25)        | 22.356        | 1.903 (25)        |
| 41L       | b-3  | 19.162 | 1.910 (10) | 26.865        | 1.725 (10)        | 16.230        | 1.740 (10)        | 19.083 | 1.837 (26) | 16.033        | 1.836 (26)        | 15.883        | 1.839 (26)        |
| 43R       | b-3  | 18.635 | 1.910 (10) | <b>23.561</b> | <b>1.725 (10)</b> | 14.726        | 1.740 (10)        | 16.887 | 1.837 (26) | 15.159        | 1.836 (26)        | 16.175        | 1.839 (26)        |
| 44R       | b-3  | 18.129 | 1.910 (10) | 24.885        | 1.725 (10)        | 16.701        | 1.740 (10)        | 19.223 | 1.837 (26) | 16.089        | 1.836 (26)        | 16.211        | 1.839 (26)        |
| 301L      | b-3  | 20.706 | 1.910 (10) | 26.589        | 1.725 (10)        | <b>16.138</b> | <b>1.740 (10)</b> | 19.559 | 1.837 (26) | 16.971        | 1.836 (26)        | 17.238        | 1.839 (26)        |
| 302R      | b-3  | 18.515 | 1.910 (10) | 28.764        | 1.725 (10)        | 16.423        | 1.740 (10)        | 20.063 | 1.837 (26) | 16.431        | 1.836 (26)        | 17.034        | 1.839 (26)        |
| 304L      | b-3  | 19.014 | 1.910 (10) | 27.510        | 1.725 (10)        | 18.223        | 1.740 (10)        | 19.799 | 1.837 (26) | 16.182        | 1.836 (26)        | 17.459        | 1.839 (26)        |
| 305L      | b-3  | 19.520 | 1.910 (10) | 25.766        | 1.725 (10)        | 16.351        | 1.740 (10)        | 20.217 | 1.837 (26) | 17.414        | 1.836 (26)        | 16.928        | 1.839 (26)        |
| 307L      | b-3  | 19.500 | 1.910 (10) | 28.886        | 1.725 (10)        | 17.333        | 1.740 (10)        | 21.000 | 1.837 (26) | 17.413        | 1.836 (26)        | 18.082        | 1.839 (26)        |
| 308R      | b-3  | 20.376 | 1.773 (11) | 28.872        | 1.707 (11)        | 20.273        | 1.729 (11)        | 20.833 | 1.715 (27) | 18.389        | 1.781 (27)        | 19.455        | 1.752 (27)        |
| 310L      | b-3  | 21.489 | 1.778 (12) | 28.508        | 1.674 (12)        | 18.939        | 1.774 (12)        | 21.020 | 1.734 (28) | 20.612        | 1.797 (28)        | 18.534        | 1.717 (28)        |
| 17L       | b-6  | 20.327 | 1.917 (13) | 25.510        | 1.900 (13)        | 14.658        | 2.037 (13)        | 20.735 | 1.940 (29) | 16.977        | 2.027 (29)        | 19.661        | 1.931 (29)        |
| 20R       | b-6  | 21.230 | 1.917 (13) | 26.974        | 1.900 (13)        | 14.906        | 2.037 (13)        | 22.282 | 1.940 (29) | 18.070        | 2.027 (29)        | 19.144        | 1.931 (29)        |
| 21L       | b-6  | 21.604 | 1.917 (13) | 28.015        | 1.900 (13)        | 15.807        | 2.037 (13)        | 24.247 | 1.940 (29) | 18.797        | 2.027 (29)        | 21.779        | 1.931 (29)        |
| 23L       | b-6  | 22.538 | 1.917 (13) | 28.061        | 1.900 (13)        | 16.426        | 2.037 (13)        | 24.750 | 1.940 (29) | 20.250        | 2.027 (29)        | 22.129        | 1.931 (29)        |
| 24R       | b-6  | 21.000 | 1.778 (12) | 29.327        | 1.674 (12)        | 17.268        | 1.774 (12)        | 19.733 | 1.734 (28) | 16.568        | 1.797 (28)        | 20.084        | 1.717 (28)        |
| 26L       | b-6  | 19.077 | 1.778 (12) | 28.598        | 1.674 (12)        | 14.244        | 1.774 (12)        | 20.252 | 1.734 (28) | 14.331        | 1.797 (28)        | 17.311        | 1.717 (28)        |
| 601R      | b-6  | 18.985 | 1.778 (12) | 27.678        | 1.674 (12)        | 15.846        | 1.774 (12)        | 18.634 | 1.734 (28) | 16.139        | 1.797 (28)        | 17.612        | 1.717 (28)        |
| 602R      | b-6  | 18.743 | 1.778 (12) | 26.290        | 1.674 (12)        | 15.535        | 1.774 (12)        | 18.768 | 1.734 (28) | 22.074        | 1.797 (28)        | 18.475        | 1.717 (28)        |
| 603R      | b-6  | 18.877 | 1.778 (12) | <b>25.937</b> | <b>1.674 (12)</b> | 16.808        | 1.774 (12)        | 20.167 | 1.734 (28) | 18.001        | 1.797 (28)        | 17.206        | 1.717 (28)        |
| 604R      | b-6  | 18.114 | 1.778 (12) | 29.631        | 1.674 (12)        | 19.272        | 1.774 (12)        | 20.181 | 1.734 (28) | 20.524        | 1.797 (28)        | 20.108        | 1.717 (28)        |
| 605L      | b-6  | 19.833 | 1.778 (12) | 27.891        | 1.674 (12)        | 15.395        | 1.774 (12)        | 19.360 | 1.734 (28) | 18.986        | 1.797 (28)        | 20.295        | 1.717 (28)        |
| 607L      | b-6  | 20.243 | 1.758 (14) | 29.153        | 1.736 (14)        | 17.873        | 1.706 (14)        | 19.578 | 1.805 (30) | 17.840        | 1.657 (30)        | 18.953        | 1.696 (30)        |
| 001R      | d-un | 24.882 | 1.946 (15) | <b>20.861</b> | <b>1.918 (15)</b> | 21.660        | 2.032 (15)        | 24.031 | 1.940 (23) | 19.867        | 1.993 (15)        | 22.281        | 1.943 (23)        |
| 012R      | d-un | 26.687 | 1.946 (15) | 26.428        | 1.918 (15)        | 22.918        | 2.032 (15)        | 26.348 | 1.940 (23) | 23.909        | 1.993 (15)        | 26.569        | 1.943 (23)        |
| 032L      | d-un | 24.159 | 1.946 (15) | 22.189        | 1.918 (15)        | 23.506        | 2.032 (15)        | 23.636 | 1.940 (23) | 20.300        | 1.993 (15)        | 24.299        | 1.943 (23)        |
| 033R      | d-un | 22.426 | 1.946 (15) | 22.791        | 1.918 (15)        | 21.663        | 2.032 (15)        | 22.423 | 1.940 (23) | 19.682        | 1.993 (15)        | 21.930        | 1.943 (23)        |
| 014R      | d-un | 24.100 | 1.964 (16) | 29.112        | 1.785 (16)        | 31.033        | 1.819 (16)        | 24.522 | 1.988 (31) | 19.799        | 2.034 (31)        | 24.399        | 1.994 (31)        |
| 032-L     | d-un | 23.040 | 1.964 (16) | 25.304        | 1.785 (16)        | 26.395        | 1.819 (16)        | 23.512 | 1.988 (31) | 19.010        | 2.034 (31)        | <b>20.425</b> | <b>1.994 (31)</b> |
| 033R      | d-un | 19.002 | 1.964 (16) | 23.144        | 1.785 (16)        | 24.701        | 1.819 (16)        | 19.334 | 1.988 (31) | 15.860        | 2.034 (31)        | 20.565        | 1.994 (31)        |
| 308R      | d-3  | 23.359 | 1.758 (14) | 26.404        | 1.736 (14)        | 30.041        | 1.706 (14)        | n/a    | n/a        | n/a           | n/a               | n/a           | n/a               |
| 27L       | d-3  | 21.365 | 1.758 (14) | 27.029        | 1.736 (14)        | 26.572        | 1.706 (14)        | 23.467 | 1.805 (30) | 25.015        | 1.657 (30)        | 21.677        | 1.696 (30)        |
| 29R       | d-3  | 20.000 | 1.758 (14) | 21.276        | 1.736 (14)        | 27.776        | 1.706 (14)        | 19.679 | 1.805 (30) | 19.688        | 1.657 (30)        | 20.234        | 1.696 (30)        |
| 30R       | d-3  | 19.385 | 1.758 (14) | 23.405        | 1.736 (14)        | 34.890        | 1.706 (14)        | 19.612 | 1.805 (30) | 18.622        | 1.657 (30)        | 24.293        | 1.696 (30)        |
| 301L      | d-3  | 21.175 | 1.758 (14) | 20.465        | 1.736 (14)        | 27.297        | 1.706 (14)        | 20.089 | 1.805 (30) | 30.319        | 1.657 (30)        | 21.047        | 1.696 (30)        |
| 302L      | d-3  | 20.000 | 1.758 (14) | 20.165        | 1.736 (14)        | 23.100        | 1.706 (14)        | n/a    | n/a        | n/a           | n/a               | n/a           | n/a               |
| 304L      | d-3  | 18.525 | 1.758 (14) | 21.702        | 1.736 (14)        | 23.055        | 1.706 (14)        | 20     |            |               |                   |               |                   |

Each cell represents the mean Cycle Threshold (Ct) of three technical replicates.

Efficiency (Eff) is given as the mean qPCR Efficiency for each gene by plate.

Numbers (1-32) given with the efficiency designate the plate on which the qPCR reaction was performed.

The "Info" column designates the group to which each mouse (Sample ID) was assigned; this includes mouse genotype and injury state.

(c = wild type; b = biglycan null; d = decorin null; -un = uninjured; -3 = 3 weeks post-injury; -6 = 6 weeks post-injury).

Outliers are in **bold**.

Failed reactions are designated with "n/a."

"Undetermined" represents a gene/sample combination receiving a Ct out of range of detection (>45).
